# Supplementary material for: A Clip Domain Serine Protease Involved in Egg Production in Nilaparvata lugens: Expression Patterns and RNA Interference
Source: MDPI journal article supplement (doi:10.3390/insects10110378), 2019-10-30
Supplement: s1 [file s1]

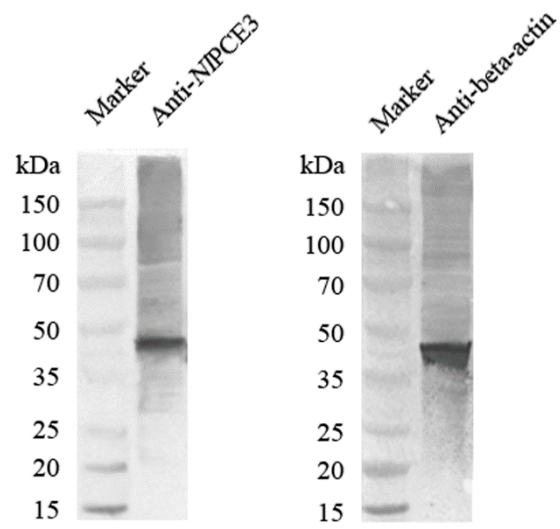

**Figure S1.** Specificity of anti-*NIPCE3* antibody analysed by western blot. Anti-*NIPCE3* antibody was purified from New Zealand rabbit. Anti-beta actin rabbit polyclonal antibody (Abbkine, USA) was taken as the positive control. The whole body of females was used to evaluate the specificity of the anti-*NIPCE3* antibody.



[illegible]

3
